# Supplementary material for: GLP-1 Targeting Agents Impair Chemoimmunotherapy Effectiveness in Triple-Negative Breast Cancer
Source: Research Square preprint supplement (doi:10.21203/rs.3.rs-8380296/v1), 2026-01-09
Supplement: Supplementary file 1 [file 2b13881b0a495eebd38c779a.xlsx]

## Sheet: Sheet1
	Supplementary Table 2: Baseline Characteristics of Patients by Diabetes Therapy Cohort
		Non GLP-1 therapies (n=46)	GLP-1 therapies (n=26)	P-Value
	Age, median [IQR]	57.2 [48.5–64.7]	60 [50.0-67.0]	0.49
	Gender, n (%)			0.33
	Female	46 (100)	25 (96.2)
	Male	0 (0.0)	1 (3.8)
	BMI, median (kg/m²) [IQR]	30.8 [26.6–36.3]	34.9 [29.0–39.3]	0.16
	Race, n (%)			0.35
	Asian	5 (10.8)	5 (19.2)
	Black	10 (21.7)	9 (34.6)
	White	27 (58.7)	12 (46.2)
	Unknown	4 (8.7)	0 (0.0)
	Ethnicity, n (%)			0.37
	Hispanic/Latino	19 (41.3)	8 (30.7)
	Not Hispanic/Latino	25 (54.3)	18 (69.3)
	Unknown	2 (4.3)	0 (0.0)
	Menopausal status, n (%)			0.66
	Pre	15 (32.6)	5 (19.2)
	Pos	31 (67.4)	20 (77.0)
	Peri	0 (0.0)	0 (0.0)
	N/Aa/ Unknown	0 (0.0)	1 (3.8)
	Hypertension, n (%)			0.065
	Yes	30 (65.3)	22 (84.6)
	No	16 (34.7)	4 (15.4)
	Hyperlipidemia, n (%)			0.31
	Yes	29 (63.0)	19 (73.0)
	No	17 (37.0)	7 (27.0)
	Type 2 DM, n (%)			0.001
	Yes	46 (100)	23 (88.4)
	No	0 (0.0)	3 (11.6)
	Histology, n (%)			0.35
	Ductal	35 (76.0)	23 (88.5)
	Lobular	1 (2.2)	0 (0.0)
	Unspecified/Otherb	10 (21.8)	3 (11.5)
	Tumor Grade, n (%)			0.5
	1	1 (2.2)	0 (0.0)
	2	6 (13.0)	5 (19.3)
	3	38 (82.6)	19 (73.0)
	Unknown	1 (2.2)	2 (7.7)
	Ki67%, median [IQR]	72 [50–85]	70 [45–83]	0.71
	Stage			0.49
	IA	1 ( 2.2)	3 (11.5)
	IIA	24 (52.2)	11(42.3)
	IIB	9 (19.6)	6(23.0)
	IIIA	7 (15.2)	2( 7.7)
	IIIB	1 ( 2.2)	1( 3.8)
	IIIC	3 ( 6.5)	1( 3.8)
	X	1 ( 2.2)	2( 7.7)
	DM/obesity treatment, n (%)c
	GLP-1 RA	0 (0.0)	23 (88.5)	<0.001
	Metformin	37 (80.4)	14 (53.8)	0.02
	Insulin	26 (56.5)	10 (38.5)	0.12
	SFU	6 (13.0)	2 (7.7)	0.72
	SGLT2	10 (21.7)	2 (7.7)	0.14
	DPP4i	0 (0.0)	4 (15.4)	0.02
	Glitazones	6 (13.0)	0 (0.0)	0.08
	Number of DM meds, n (%)			0.61
	1	18 (39.1)	7 (26.9)
	2	19 (41.3)	11 (42.3)
	3	7 (15.2)	6 (23.1)
	4	2 (4.3)	2 (7.7)
