# Supplementary material for: GLP-1 Targeting Agents Impair Chemoimmunotherapy Effectiveness in Triple-Negative Breast Cancer
Source: Research Square preprint supplement (doi:10.21203/rs.3.rs-8380296/v1), 2026-01-09
Supplement: Supplementary file 2 [file 373109c251d1d4b445fefe7b.xlsx]

## Sheet: Planilha1
	Supplementary Table 1: Baseline Characteristics of Profiled Cases and Controls
	Case	Cohort	Age	BMI	Comorbidities	Number DM meds	Stage	RCB
	patient_1	GLP-1 exposed	60	37.5	HTN, HLD, DM	2	III	2
	patient_2	GLP-1 exposed	44	29.3	HTN, HLD	1	II	3
	patient_7	GLP-1 exposed	45	51.9	HTN, HLD	1	II	2
	patient_8	DPP4i exposed	65	29.05	HTN, HLD, DM	2	II	3
	patient_9	DPP4i exposed	54	28.71	HTN, HLD, DM	4	III	3
	patient_10	GLP-1 exposed	48	30.34	HTN	1	II	0
	patient_11	GLP-1 exposed	63	23.37	No	1	II	0
	patient_12	Not exposed	68	30.47	HTN, HLD, DM	1	II	2
	patient_13	Not exposed	78	20.9	HTN, DM	1	II	2
	patient_14	Not exposed	43	27.44	DM	1	II	3
	patient_15	Not exposed	56	38.06	HTN, DM	2	II	1
	Abbreviations: GLP-1, Glucagon-Like Peptide-1; DPP4i, Dipeptidyl-peptidase-4 inhibitors; BMI, body mass index;
	HTN, Hypertension; HLD, Hyperlipidemia; DM, Diabetes Mellitus; RCB, Residual Cancer Burden
