# Supplementary material for: GLP-1 Targeting Agents Impair Chemoimmunotherapy Effectiveness in Triple-Negative Breast Cancer
Source: Research Square preprint supplement (doi:10.21203/rs.3.rs-8380296/v1), 2026-01-09
Supplement: Supplementary file 3 [file 6fc822b809fcee056c3c8b52.xlsx]

## Sheet: Planilha1
	Table 1: Baseline Characteristics of Patients by Cohort
		Non-diabetic (n=271)	Non GLP-1 therapies (n=46)	GLP-1 therapies (n=26)	P-Value
	Age, median [IQR]	51.5 [44.1–63.7]	57.2 [48.5–64.7]	60 [50.0-67.0]	0.005
	Gender, n (%)				0.99
	Female	271 (100)	46 (100)	25 (96.2)
	Male	0 (0.0)	0 (0.0)	1 (3.8)
	BMI, median (kg/m²) [IQR]	28.2 [24.8–33.5]	30.8 [26.6–36.3]	34.9 [29.0–39.3]	<0.0001
	Race, n (%)				0.021
	Asian	27 (10.0)	5 (10.8)	5 (19.2)
	Black	46 (17.0)	10 (21.7)	9 (34.6)
	White	189 (69.7)	27 (58.7)	12 (46.2)
	Unknown	9 (3.3)	4 (8.7)	0 (0.0)
	Ethnicity, n (%)				0.35
	Hispanic/Latino	83 (30.6)	19 (41.3)	8 (30.7)
	Not Hispanic/Latino	181 (66.7)	25 (54.3)	18 (69.3)
	Unknown	7 (2.6)	2 (4.3)	0 (0.0)
	Menopausal status, n (%)				0.004
	Pre	134 (49.4)	15 (32.6)	5 (19.2)
	Pos	131 (48.3)	31 (67.4)	20 (77.0)
	Peri	5 (1.9)	0 (0.0)	0 (0.0)
	N/Aa/Unknown	1 (0.4)	0 (0.0)	1 (3.8)
	Hypertension, n (%)				<0.0001
	Yes	60 (22.0)	30 (65.3)	22 (84.6)
	No	211 (78.0)	16 (34.7)	4 (15.4)
	Hyperlipidemia, n (%)				<0.0001
	Yes	65 (24.0)	29 (63.0)	19 (73.0)
	No	206 (76.0)	17 (37.0)	7 (27.0)
	Type 2 diabetes mellitus, n (%)				<0.0001
	Yes	3 (1.1)	46 (100)	23 (88.4)
	No	268 (98.9)	0 (0.0)	3 (11.6)
	Histology, n (%)				0.015
	Ductal	249 (91.9)	35 (76.0)	23 (88.5)
	Lobular	4 (1.5)	1 (2.2)	0 (0.0)
	Unspecified/Otherb	18 (6.6)	10 (21.8)	3 (11.5)
	Tumor Grade, n (%)				0.15
	1	1 (0.4)	1 (2.2)	0 (0.0)
	2	32 (11.8)	6 (13.0)	5 (19.3)
	3	234 (86.3)	38 (82.6)	19 (73.0)
	Unknown	4 (1.5)	1 (2.2)	2 (7.7)
	Ki67%, median [IQR]	80 [70-90]	72 [50–85]	70 [45–83]	<0.0001
	Clinical T stage, n (%)				0.72
	1	32 (11.8)	3 (6.5)	5 (19.3)
	2	159 (58.7)	32 (69.6)	15 (57.6)
	3	55 (20.3)	7 (15.2)	4 (15.4)
	4	21 (7.8)	3 (6.5)	2 (7.7)
	X	3 (1.1)	1 (2.2)	0 (0.0)
	Clinical N stage, n (%)				0.02
	0	136 (50.2)	25 (54.3)	14 (53.9)
	1	109 (40.2)	11 (24.0)	9 (34.6)
	2	9 (3.3)	6 (13.0)	0 (0.0)
	3	15 (5.6)	3 (6.5)	1 (3.8)
	X	2 (0.7)	1 (2.2)	2 (7.7)
	Diabetes/obesity treatment, n (%)c
	GLP-1 RA	0 (0.0)	0 (0.0)	23 (88.5)
	Metformin	0 (0.0)	37 (80.4)	14 (53.8)
	Insulin	0 (0.0)	26 (56.5)	10 (38.5)
	SFU	0 (0.0)	6 (13.0)	2 (7.7)
	SGLT2	0 (0.0)	10 (21.7)	2 (7.7)
	DPP4i	0 (0.0)	0 (0.0)	4 (15.4)
	Glitazones	0 (0.0)	6 (13.0)	0 (0.0)
	Number of diabetes medications, n (%)				<0.001
	1	0 (0.0)	18 (39.1)	7 (26.9)
	2	0 (0.0)	19 (41.3)	11 (42.3)
	3	0 (0.0)	7 (15.2)	6 (23.1)
	4	0 (0.0)	2 (4.3)	2 (7.7)
	Abbreviations: GLP-1 RA, Glucagon-Like Peptide-1 Receptor Agonists; SFU, Sulfonylureas; SGLT2, Sodium-Glucose Transport Protein 2 Inhibitors; DPP4i, Dipeptidyl-peptidase-4 inhibitors
	aMenopausal status: "N/A" applied to the male patient in "GLP-1 therapies"
	bHistology: "Other" includes non-ductal/lobular subtypes (e.g., micropapillary, papillary, "No Special Type").
	cDiabetes/obesity treatment: Multiple medications per patient allowed. Percentages sum to >100% for treatment types.
