# Supplementary material for: GLP-1 Targeting Agents Impair Chemoimmunotherapy Effectiveness in Triple-Negative Breast Cancer
Source: Research Square preprint supplement (doi:10.21203/rs.3.rs-8380296/v1), 2026-01-09
Supplement: Supplementary file 4 [file 8d3a368ac1a762c2042aa0e6.xlsx]

## Sheet: Planilha1
	Table 2. Demographic and Clinical Characteristics Before Propensity Score Matching, and 1:1 Propensity score and exact-matched cohorts
			Before Propensity Score Matching				1:1 Propensity Score Matching
		Non GLP-1 therapies (N=46)	GLP-1 therapies (N=26)	All patients (N=72)	P-Value	Non GLP-1 therapies (N=21)	GLP-1 therapies (N=21)	All patients (N=42)	P-Value
	Age, mean ± SD	56.4±10.9	57.8±11.5	56.9±11.0	0.611	56.9±11.4	57.4±11.2	57.2±11.2	0.871
	Age, median [IQR]	57.2 [48.5-64.7]	60 [50.0-67.0]	58 [48.7-65.0]	0.485	58 [51.0-64.8]	60 [53.0-66.0]	60 [51.0-66.0]	0.762
	BMI, mean ± SD	31.7±7.2	34.2±7.9	32.6±7.5	0.173	34.8±7.6	34.4±6.7	34.6±7.0	0.869
	BMI, median [IQR]	30.8 [26.6-36.3]	34.9 [29.0-39.3]	31.1 [27.4-37.2]	0.164	35.1 [30.4-37.0]	34.7 [29.3-39.0]	34.9 [29.9-39.0]	0.979
	Number of DM meds, mean ± SD	1.84±0.84	2.11±0.90	1.94±0.87	0.212	1.95±0.74	2.09±0.83	2.02±0.78	0.559
	Number of DM meds, median [IQR]	2 [1-2]	2 [1-3]	2 [1-2]	0.211	2 [1-2]	2 [2-3]	2 [1-3]	0.635
	Stage, n (%)				0.192				1
	I	1 (2.2)	3 (12.5)	4 (5.8)		1 ( 4.8)	1 ( 4.8)	2 ( 4.8)
	II	33 (73.3)	17 (70.8)	50 (72.5)		16 (76.2)	16 (76.2)	32 (76.2)
	III	11 (24.4)	4 (16.7)	15 (21.7)		4 (19.0)	4 (19.0)	8 (19.0)
	pCR rate, n (%)				0.008				0.013
	No	17 (37.0)	18 (69.2)	35 (48.6)		7 (33.3)	15 (71.4)	22 (52.4)
	Yes	29 (63.0)	8 (30.8)	37 (51.4)		14 (66.7)	6 (28.6)	20 (47.6)
	Abbreviations: BMI, body mass index; DM, diabetes mellitus
	Propensity score matching and exact matching were performed from the cohorts non GLP-1 therapies and GLP-1 targeting agents.
